# MIND TO MIND

*Creative writing that explores the abstract side  
of our profession and our lives*

*Carol Wiley Cassella, M.D., Editor*

## Electrocardiogram

Audrey Shafer, M.D.

**T**he repolarization of a t wave  
an ocean roller over an invisible sand bar, a lull  
until a p wave begins its small rise above the isoelectric  
the chop of look-at-me qrs's  
not called complexes for nothing  
peaks, troughs, weddings, divorces  
births transforming more than bodies into mothers  
and deaths  
underneath the swells  
salt churns cold and warm currents  
a low t wave stretches into a u  
waves in succession  
storms of qrs's surging into t's  
wide and lopsided as sinking freighters

From the Stanford University School of Medicine and Veterans Affairs Palo Alto Health Care System, Palo Alto, California. [ashafer@stanford.edu](mailto:ashafer@stanford.edu)

Accepted for publication May 30, 2014.

Copyright © 2014, the American Society of Anesthesiologists, Inc. Lippincott Williams & Wilkins. *Anesthesiology* 2015; 122:206-7

till a pause between series  
the ocean a windless lake  
no more p's, no more qrs's, no more t's  
  
this is my autobiography:  
the story of a wave  
and then the next
